# Supplementary material for: Rapid degeneration of iPSC-derived motor neurons lacking Gdap1 engages a mitochondrial-sustained innate immune response
Source: PubMed Central journal article supplement (PMC10314916; doi:10.1038/s41420-023-01531-w), 2023-07-01

Original data files-1

Figure 5A & Supp. Figures 1C, 3A

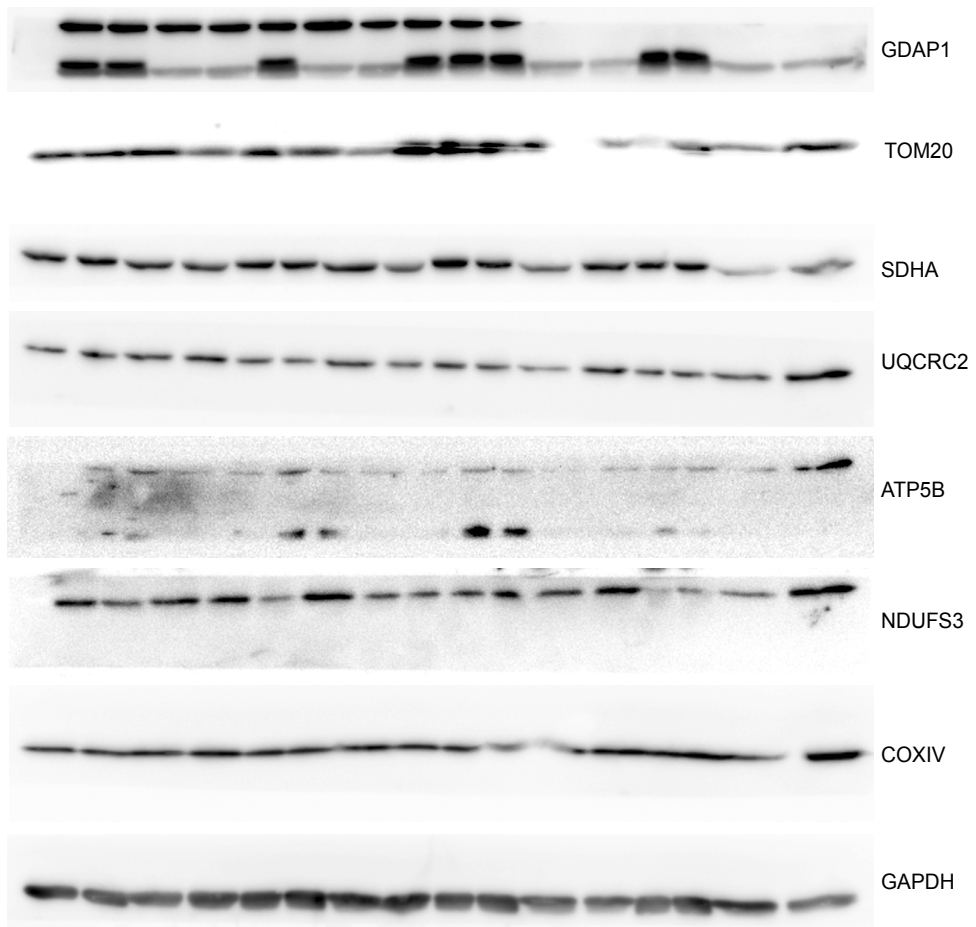

Figure 5B

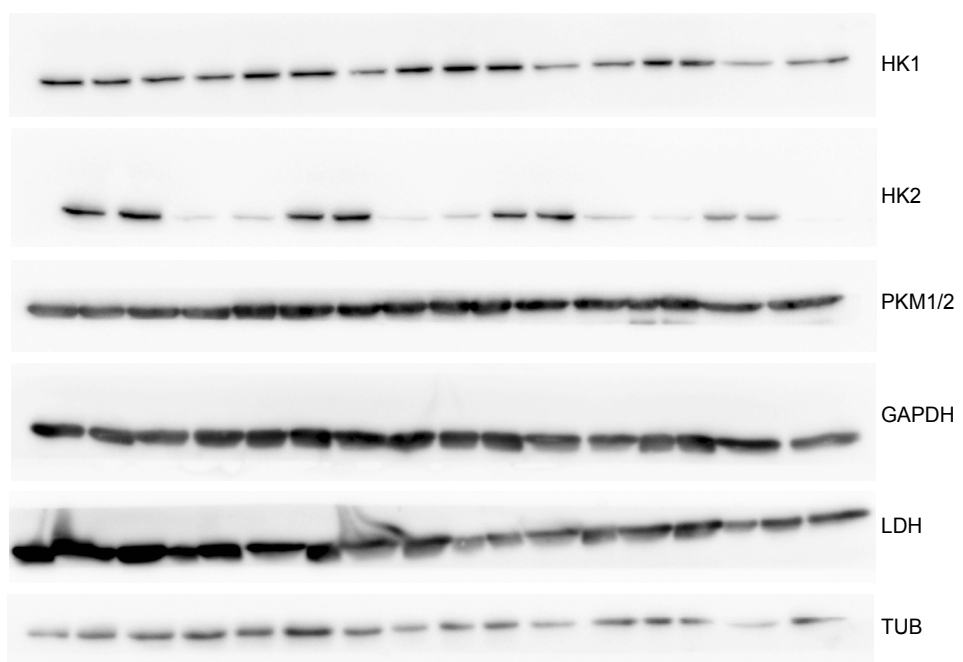

# Original data files-2

Supp. Figure 3A

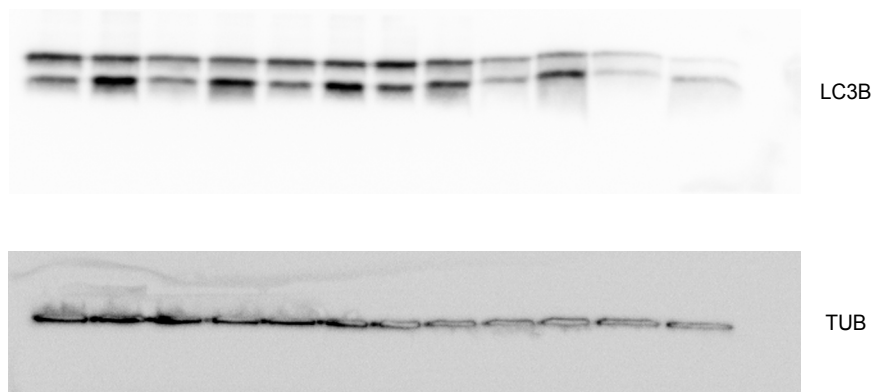

Figure 5C

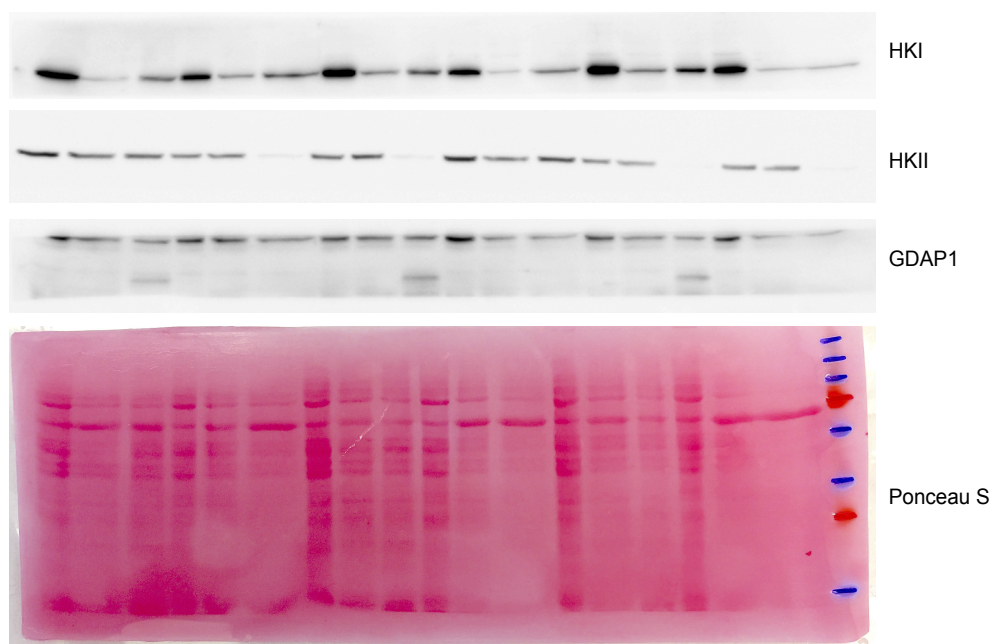

Figure 7 & Supp. Figure 3B

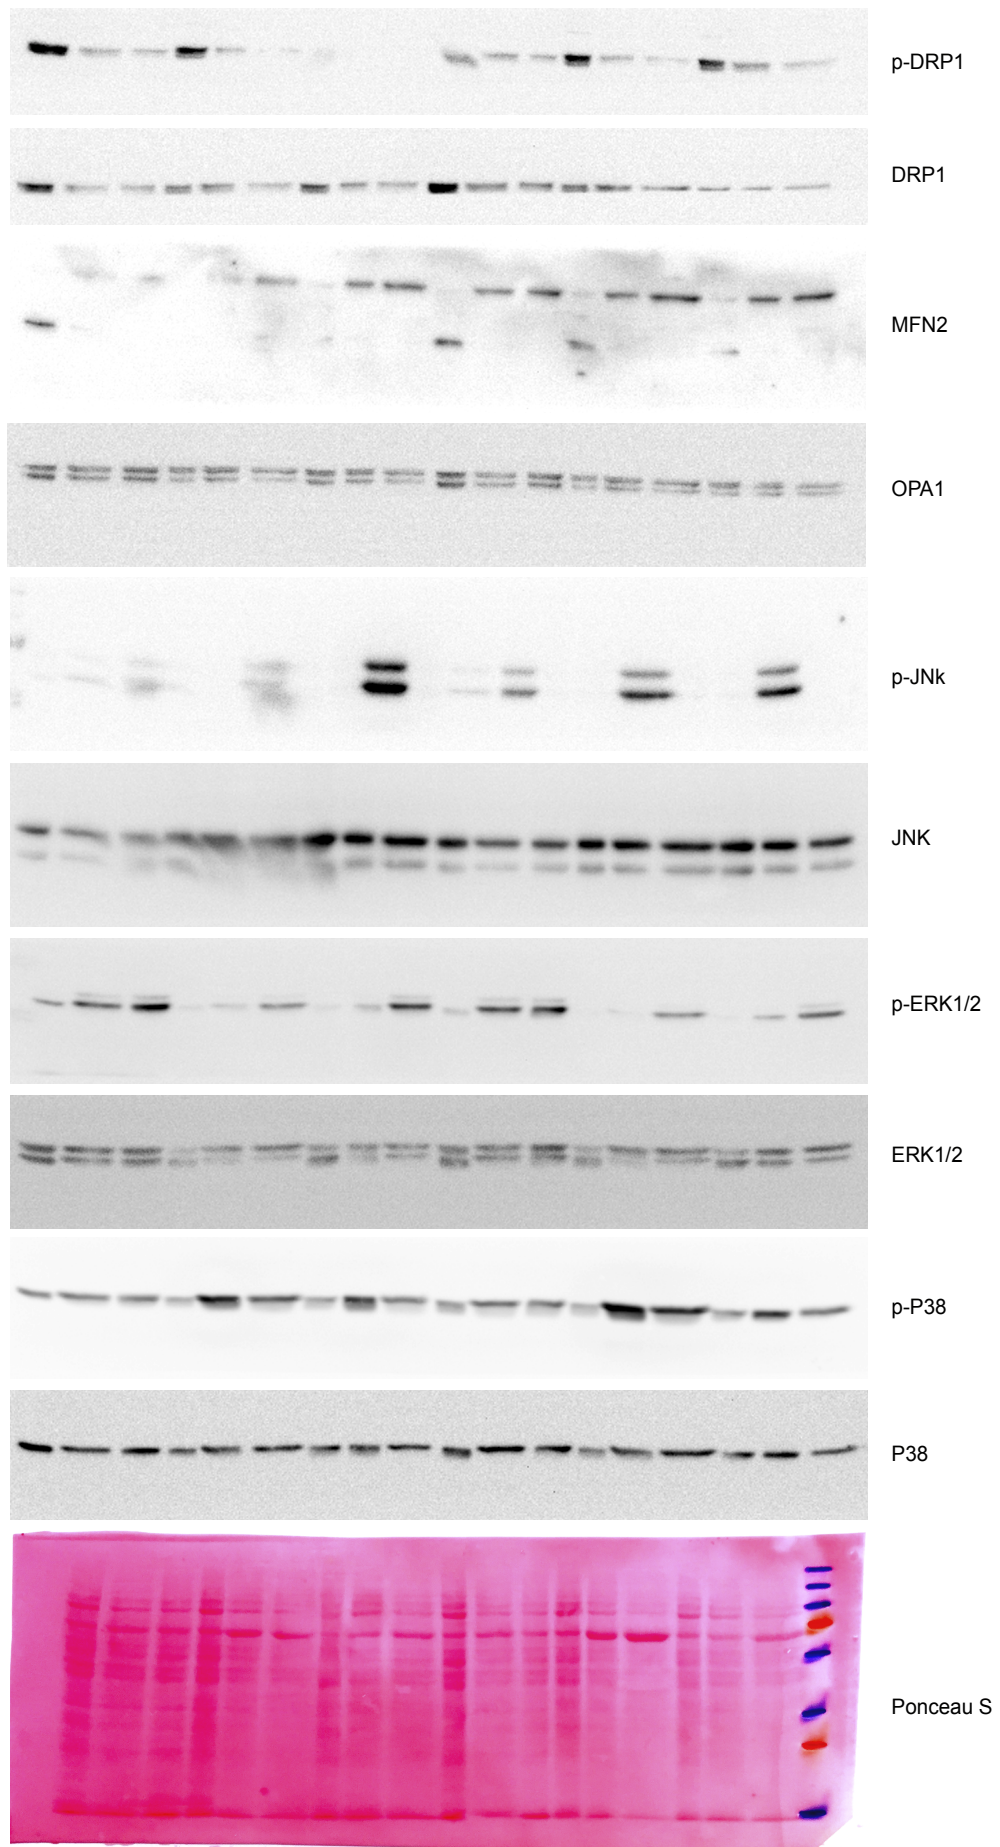

Supplement: 41420_2023_1531_MOESM5_ESM.pdf [file 41420_2023_1531_MOESM5_ESM.pdf]
